# Supplementary material
Source: Springer Nature journal article supplement (https://www.springermedizin.de/resource/supplementary/12885_2008_1190_MOESM2_ESM.pdf/9471356)

Overall survival from recurrence

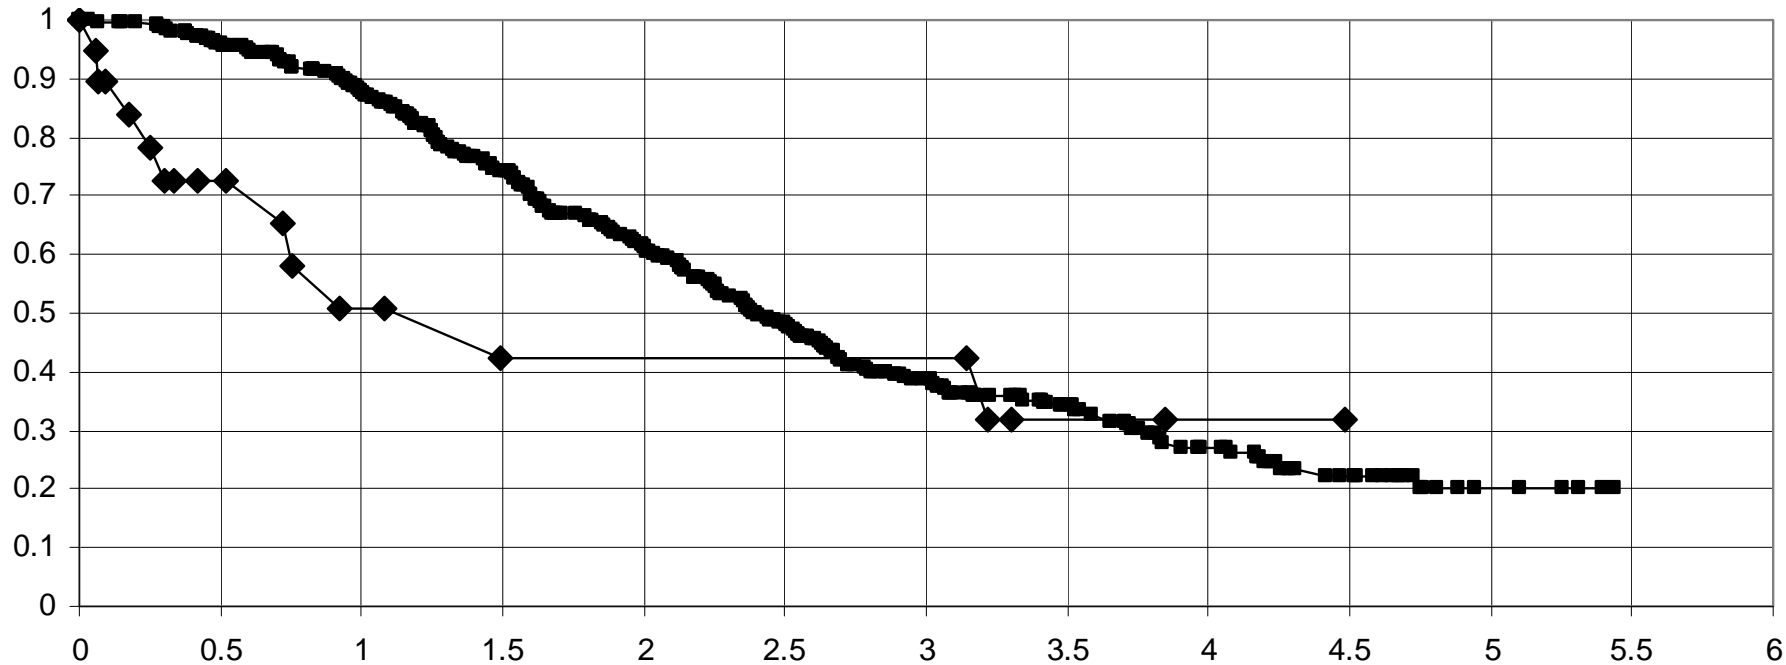

years

Supplement: MOESM2 [file 9471356]
